# Supplementary material
Source: publisher site journal article supplement (https://www.dovepress.com/get_supplementary_file.php?f=487747.docx)
Supplement: Supplementary file 1 [file get_supplementary_file.php]

**Table S1. Screening tools used to assess clinical burden and treatment expectations and satisfaction**

| **Screening tool** | **Description** | **Response and scoring system** |
| --- | --- | --- |
| PHQ-9  (Kroenke et al., 2001) | 9-item questionnaire was administered to all non-physician respondents to measure the frequency of depression symptoms experienced in the past 2 weeks | - Items were rated on a 4-point scale (0=not at all to 3=nearly every day) - Items were summed up into a total score range of 0 to 27: - 0-4: No depression - 5-9: Mild depression - 10-14: Moderate depression - 15-19: Moderate-severe depression - 20-27: Severe depression |
| SHAPS  Snaith et al., 1995, Trøstheim et al., 2020). | 14-item scale assessing 4 domains of pleasure response:   - interest/pastimes - social interaction - sensory experience - food/drink | - Scored on a 2-point scale (1 = strongly disagree, 1 = disagree, 0 = agree, 0 = strongly agree); total score range: 0-14 (>2: anhedonia) - MDD patients who disagreed or strongly disagreed with >2 items (2-point SHAPS > 2) were considered anhedonic and categorized into the MDD ANH group |
| Importance of treatment goals | Assessed MDD and anhedonia symptoms in terms of treatment importance | - Rating on a Likert scale of 1-5; where higher scores indicate greater importance |
| Satisfaction with treatment goals | Assessed satisfaction of treatment received for MDD and anhedonia symptoms | - Rating on a Likert scale of 1-9; where higher scores indicate greater satisfaction |

MDD, major depressive disorder; PHQ-9, 9-item Patient Health Questionnaire; SHAPS, Snaith-Hamilton Pleasure Scale.

**Table S2. Depression-specific characteristics and treatment patterns**

| Variable | **Definition** |
| --- | --- |
| Depression Symptoms Prompting Diagnosis (three main symptoms) | - Depressed mood and other emotional problems (e.g., hopelessness, tiredness, anxiety) - Eating pattern changes (e.g., appetite loss, weight loss, overeating, weight gain) - Sleep pattern changes (e.g., difficulty sleeping, oversleeping, waking up early) - Mental changes (e.g., forgetfulness, difficulty thinking, difficulty concentrating) - Social problems (e.g., isolation, alcohol problems, drug problems, sex problems) - Physical problems (e.g., headaches, body aches, constipation) - None of these |
| Time since Depression Diagnosis (years) | Calculated from the year of depression diagnosis |
| Diagnosing HCP | - Primary Care Physician/GP/Internist - Nurse Practitioner/Physician Assistant - Psychiatrist - Psychologist - Neurologist - Other |
| **Prescription Used of respondents currently on a prescription for depression)** | |
| Current Prescription Use for Depression | Yes/No |
| Current Use of Multiple Prescriptions for Depression | Yes/No |
| **Prescribing HCP** | - General Practitioner / Family Practitioner - General Internist / Internal medicine physician - Psychiatrist - Other |
| **Prior Medication Use and Reasons for Switching** | |
| Prior Medication, Treatment, or Therapy | Yes/No |
| Current Medication Replaced or Added to Previous Medication | - Replaced my existing medication, treatment, or therapy - Added on to my existing medication, treatment, or therapy - Not sure |
| Reasons for switching | - Doctor’s recommendation - To reduce side effects - Lower cost - I was not responding to the previous treatment - The dosing of the current treatment is more convenient - The form or mode of administration is more convenient - Others |

HCP, healthcare provider.

**Table S3.** **Assessment of physician perspectives towards anhedonia in MDD**

| **Variables** | **Statements/Response options** |
| --- | --- |
| **Physician perspectives towards anhedonia in MDD** (Rated on a 1-9 Likert scale [1=strongly disagree to 9=strongly agree]) | - Anhedonia is defined as the markedly diminished interest or pleasure in all, or almost all, activities most of the day, nearly every day - Currently, there is an inconsistent conceptualization and therefore, a lack of both an accurate and consistent definition of anhedonia in MDD - Overall, there is clinical value and importance in defining MDD with anhedonia as a subtype of MDD - Anhedonia is a core symptom of MDD - It is difficult to diagnose anhedonia in MDD patients in clinical practice - It is difficult to treat anhedonia in MDD patients in clinical practice - It is important to diagnose anhedonia in my MDD patients - It is important to treat anhedonia in my MDD patients - MDD patients with anhedonia require different treatments vs. MDD patients without anhedonia - When pharmaceutical treatments improve symptoms in MDD patients with anhedonia, their anhedonia and non-anhedonia symptoms improve alongside each other - Anhedonia is very similar to melancholia - Currently, there is an inconsistent conceptualization and therefore, a lack of both an accurate and consistent definition of anhedonia in MDD |
| **Treatment preference** when treating MDD-ANH patients | - I focus on treating anhedonia separately from non-anhedonia symptoms for my MDD patients with anhedonia - I do not focus on treating anhedonia separately from non-anhedonia symptoms for my MDD patients with anhedonia |
| **Treatment preference:** Drug class HCP considers prescribing to treat MDD-ANH | - SSRI (Yes/No) - SNRI (Yes/No) - TCA (Yes/No) - TeCA (Yes/No) - Dopamine norepinephrine reuptake inhibitors (Yes/No) - Serotonin modulators (Yes/No) - Norepinephrine-serotonin modulators (Yes/No) - Anticonvulsants (Yes/No) - Atypical antipsychotics (Yes/No) - Benzodiazepines (Yes/No) - Melatonin receptor agonists (Yes/No) |
| **Treatment satisfaction:** Level of satisfaction with pharmaceutical treatment classes (Rated on a 1-9 Likert scale) | - SSRI (e.g., escitalopram, citalopram, sertraline) - SNRI (e.g., duloxetine, venlafaxine, desvenlafaxine) - TCA (e.g., imipramine) - TeCA (e.g., mirtazapine, amoxapine, maprotiline) - Dopamine norepinephrine reuptake inhibitors (e.g., bupropion) - Serotonin modulators (e.g., vortioxetine, nefazodone) - Norepinephrine-serotonin modulators (e.g., viloxazine) - Anticonvulsants (e.g., carbamazepine, lamotrigine) - Atypical antipsychotics (e.g., aripiprazole, amisulpride) - Benzodiazepines (e.g., alprazolam, diazepam) - Melatonin receptor agonists (e.g., agomelatine) |

ANH, anhedonia; HCP, healthcare provider; MDD, major depressive disorder; SNRI, Serotonin-norepinephrine reuptake inhibitors; SSRI, selective serotonin reuptake inhibitors; TCA, tricyclic antidepressants; TeCA, Tetracyclic antidepressants.

**Table S4. Statements for assessment of patients’ and physicians’ perspectives on treatment goals and satisfaction**

| **Statements for assessing the importance of treatment goals and treatment satisfaction** |
| --- |
| - Control depressed mood (e.g., sadness) - Reduce psychological anxiety (e.g., feeling irritable and worried) - Regain appetite - Improve sleep quality - Reduce the feeling of fatigue - Regain interest in hobbies - Avoid having suicidal thoughts - Improve productivity at work, school, and home (e.g., household chores) - Restore normal social function (i.e., participate and enjoy relationships with family, and friends) - Have positive emotions (e.g., optimism) - Regain self-esteem - Improve sexual satisfaction - Increase attention span |

**Table S5. Demographics and Patient Caseload of Physicians**

| Variable | Healthcare Providers (N=340) |
| --- | --- |
| Country, n (%) |  |
| Australia | 50 (14.7) |
| China | 60 (17.7) |
| Japan | 60 (17.7) |
| Malaysia | 50 (14.7) |
| South Korea | 60 (17.7) |
| Taiwan | 60 (17.7) |
| Primary place of practice Australia, China, Japan, Malaysia, South Korea, n (%) |  |
| Public hospital / clinic | 121 (35.6) |
| Private hospital / clinic | 159 (46.8) |
| Primary place of practice Taiwan, n (%) |  |
| Medical Center | 16 (4.7) |
| Regional Hospital | 21 (6.2) |
| Area Hospital | 23 (6.8) |
| Years practicing as a psychiatrist, mean (SD) | 16.77 (8.5) |
| Percentage of time in direct patient care, mean (SD) | 82.83 (13.7) |
| Number of MDD patients seen in the past month, mean (SD) | 129.22 (132.1) |
| MDD severity among MDD patients, n (%) |  |
| mild MDD | 36.09 (18.5) |
| moderate MDD | 38.64 (13.1) |
| severe MDD | 25.26 (15.1) |
| MDD outpatients among all MDD patients, n (%) | 75.66 (24.1) |
| MDD patients with anhedonia, n (%) | 49.47 (25.4) |
| Severity of anhedonia in MDD patients, mean (SD) |  |
| % of MDD patients with mild anhedonia | 33.38 (18.9) |
| % of MDD patients with moderate anhedonia | 35.45 (13.1) |
| % of MDD patients with severe anhedonia | 31.17 (20.5) |
| I don't know the breakdown | 0.30 (0.5) |

MDD, major depressive disorder; SD, standard deviation.

**Figure S1. Study Population**


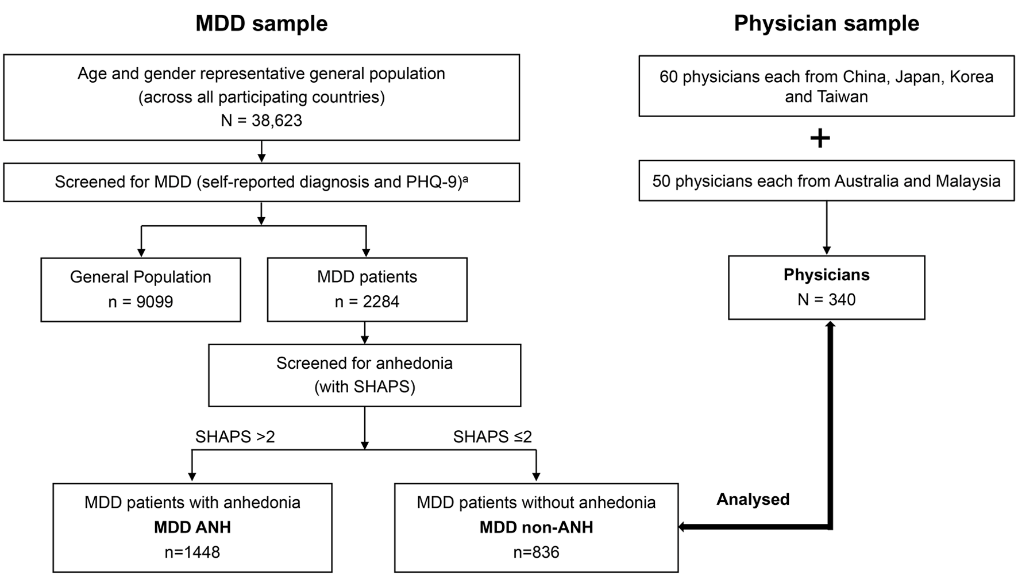


ANH, anhedonia; PHQ-9, 9-item Patient Health Questionnaire; MDD, major depressive disorder; SHAPS, 14-item Snaith-Hamilton Pleasure Scale.

aRespondents were classified under MDD if they reported moderate Depression or greater (PHQ-9 ≥ 10) and a self-reported physician diagnosis of depression.
